# Supplementary material
Source: Research Square preprint supplement (doi:10.21203/rs.3.rs-9562315/v1)

Supplementary file

Gel electrophoresis diagram of 50 samples


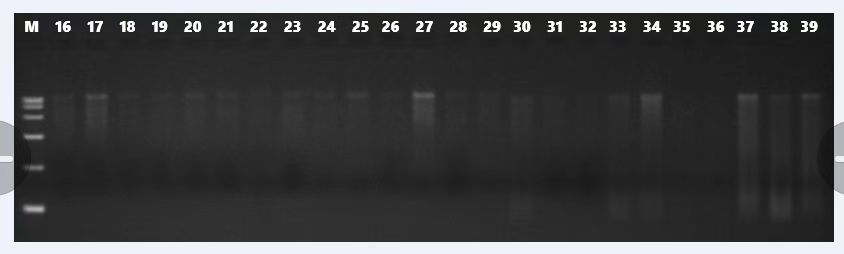


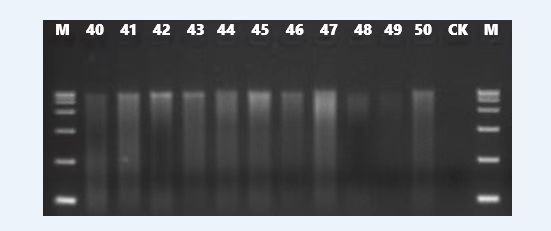

Supplement: Supplementary file 1 [file 5e497ba6db5f4bf621281e22.docx]
